# Supplementary material
Source: HighWire-hosted journal article supplement (https://www.cmajopen.ca/highwire/filestream/90839/field_highwire_adjunct_files/0/open-2023-0044-1-at.pdf)
Supplement: open-2023-0044-1-at.pdf [file open-2023-0044-1-at.pdf]

**Table 1: Frequency and Percentage of Hospitalizations for PEH (ICD-10-CA Z59.0), 2015/16 to 2020/21**

| Fiscal Quarter | PEH Frequency | Total Hospitalizations | Percent PEH |
|----------------|---------------|------------------------|-------------|
| 2015Q1         | 1,618         | 1,530,802              | 0.11        |
| 2015Q2         | 1,854         | 1,432,912              | 0.13        |
| 2015Q3         | 1,881         | 1,474,212              | 0.13        |
| 2015Q4         | 1,581         | 1,463,492              | 0.11        |
| 2016Q1         | 1,781         | 1,586,362              | 0.11        |
| 2016Q2         | 2,103         | 1,457,133              | 0.14        |
| 2016Q3         | 2,054         | 1,507,421              | 0.14        |
| 2016Q4         | 1,958         | 1,549,004              | 0.13        |
| 2017Q1         | 2,272         | 1,575,285              | 0.14        |
| 2017Q2         | 2,557         | 1,468,265              | 0.17        |
| 2017Q3         | 2,667         | 1,537,309              | 0.17        |
| 2017Q4         | 2,518         | 1,555,462              | 0.16        |
| 2018Q1         | 4,321         | 1,605,952              | 0.27        |
| 2018Q2         | 4,768         | 1,484,701              | 0.32        |
| 2018Q3         | 5,034         | 1,570,624              | 0.32        |
| 2018Q4         | 4,366         | 1,560,174              | 0.28        |
| 2019Q1         | 4,764         | 1,608,733              | 0.30        |
| 2019Q2         | 5,276         | 1,513,756              | 0.35        |
| 2019Q3         | 5,292         | 1,549,578              | 0.34        |
| 2019Q4         | 5,413         | 1,452,110              | 0.37        |
| 2020Q1         | 5,188         | 959,019                | 0.54        |
| 2020Q2         | 5,402         | 1,437,509              | 0.38        |
| 2020Q3         | 5,574         | 1,440,191              | 0.39        |
| 2020Q4         | 5,365         | 1,430,678              | 0.37        |

**Source:**

Hospital Morbidity Database (HMDB), 2015/16 to 2020/21, Canadian Institute for Health Information.

**Notes:**

† Time points are displayed in fiscal quarters. For example, "2015Q1" represents the period April 1, 2015 through June 30, 2015.

PEH - People experiencing homelessness

Table 2: Percentage of Hospitalizations for PEH (ICD-10-CA Z59.0) by Census Subdivision Groups, 2015/16 to 2020/21

|                                             |                        | 2015Q1  | 2015Q2  | 2015Q3  | 2015Q4  | 2016Q1  | 2016Q2  | 2016Q3  | 2016Q4  | 2017Q1  | 2017Q2  | 2017Q3  | 2017Q4  | 2018Q1  | 2018Q2  | 2018Q3  | 2018Q4  | 2019Q1  | 2019Q2  | 2019Q3  | 2019Q4  | 2020Q1  | 2020Q2  | 2020Q3  | 2020Q4  |
|---------------------------------------------|------------------------|---------|---------|---------|---------|---------|---------|---------|---------|---------|---------|---------|---------|---------|---------|---------|---------|---------|---------|---------|---------|---------|---------|---------|---------|
| Major CMA<br>(Toronto, Montreal, Vancouver) | PEH Frequency          | 840     | 923     | 1,014   | 860     | 911     | 1,074   | 1,112   | 1,084   | 1,187   | 1,233   | 1,315   | 1,250   | 1,642   | 1,699   | 1,962   | 1,674   | 1,696   | 1,820   | 1,814   | 1,791   | 1,769   | 1,685   | 1,705   | 1,669   |
|                                             | Total Hospitalizations | 484,921 | 459,618 | 467,591 | 464,659 | 502,081 | 470,424 | 482,300 | 491,929 | 502,642 | 474,149 | 493,001 | 495,368 | 513,358 | 481,844 | 507,499 | 499,702 | 515,668 | 493,959 | 509,793 | 471,316 | 303,674 | 483,913 | 471,298 | 450,006 |
|                                             | Percentage             | 0.17    | 0.2     | 0.22    | 0.19    | 0.18    | 0.23    | 0.23    | 0.22    | 0.24    | 0.26    | 0.27    | 0.25    | 0.32    | 0.35    | 0.39    | 0.34    | 0.33    | 0.37    | 0.36    | 0.38    | 0.58    | 0.35    | 0.36    | 0.37    |
| Other CMA                                   | PEH Frequency          | 469     | 561     | 555     | 434     | 526     | 600     | 606     | 552     | 607     | 700     | 844     | 722     | 1,722   | 1,980   | 2,047   | 1,798   | 2,013   | 2,323   | 2,337   | 2,440   | 2,300   | 2,455   | 2,534   | 2,447   |
|                                             | Total Hospitalizations | 626,797 | 582,437 | 607,093 | 601,043 | 656,675 | 598,182 | 624,126 | 640,992 | 652,921 | 604,177 | 638,849 | 646,898 | 670,383 | 614,040 | 654,799 | 652,427 | 673,508 | 628,946 | 636,803 | 599,312 | 399,914 | 578,051 | 591,458 | 601,846 |
|                                             | Percentage             | 0.07    | 0.1     | 0.09    | 0.07    | 0.08    | 0.1     | 0.1     | 0.09    | 0.09    | 0.12    | 0.13    | 0.11    | 0.26    | 0.32    | 0.31    | 0.28    | 0.3     | 0.37    | 0.37    | 0.41    | 0.58    | 0.42    | 0.43    | 0.43    |
| Census Amalgamations                        | PEH Frequency          | 251     | 307     | 243     | 234     | 260     | 349     | 264     | 257     | 402     | 532     | 440     | 476     | 775     | 857     | 876     | 756     | 872     | 959     | 970     | 1,012   | 959     | 1,053   | 1,113   | 1,042   |
|                                             | Total Hospitalizations | 293,520 | 274,472 | 281,132 | 279,295 | 300,551 | 274,407 | 283,150 | 293,981 | 296,070 | 277,075 | 288,247 | 293,941 | 300,290 | 277,371 | 290,303 | 289,777 | 297,441 | 278,440 | 288,292 | 273,515 | 183,402 | 268,798 | 270,021 | 272,451 |
|                                             | Percentage             | 0.09    | 0.11    | 0.09    | 0.08    | 0.09    | 0.13    | 0.09    | 0.09    | 0.14    | 0.19    | 0.15    | 0.16    | 0.26    | 0.31    | 0.3     | 0.26    | 0.29    | 0.34    | 0.34    | 0.37    | 0.52    | 0.39    | 0.41    | 0.38    |
| Rural Areas                                 | PEH Frequency          | 58      | 63      | 69      | 53      | 84      | 80      | 72      | 65      | 76      | 92      | 68      | 70      | 182     | 232     | 149     | 138     | 183     | 174     | 171     | 170     | 160     | 209     | 222     | 207     |
|                                             | Total Hospitalizations | 122,253 | 113,713 | 115,459 | 115,462 | 123,694 | 111,404 | 114,901 | 119,071 | 120,482 | 110,461 | 114,317 | 116,530 | 118,592 | 109,040 | 114,930 | 115,188 | 118,711 | 109,759 | 111,593 | 105,305 | 71,026  | 104,940 | 104,698 | 104,060 |
|                                             | Percentage             | 0.05    | 0.06    | 0.06    | 0.05    | 0.07    | 0.07    | 0.06    | 0.05    | 0.06    | 0.08    | 0.06    | 0.06    | 0.15    | 0.21    | 0.13    | 0.12    | 0.15    | 0.16    | 0.15    | 0.16    | 0.23    | 0.2     | 0.21    | 0.2     |

Source:  
Hospital Morbidity Database (HMD8), 2015/16 to 2020/21, Canadian Institute for Health Information.

Notes:  
† Time points are displayed in fiscal quarters. For example, "2015Q1" represents the period April 1, 2015 through June 30, 2015.  
See here for an additional aid for geographic breakdowns: <https://www12.statcan.gc.ca/census-recensement/2011/ref/dict/figures/figure3-dict-eng.cfm>  
PEH - People experiencing homelessness  
Geographic breakdowns are based on Statistic Canada's Statistical Area Classification.
